# Supplementary material for: Cell cycle progression in glioblastoma cells is unaffected by pathophysiological levels of hypoxia
Source: PubMed Central journal article supplement (PMC4782743; doi:10.7717/peerj.1755), 2016-03-03
Supplement: peerj-04-1755-s001.pdf [file peerj-04-1755-s001.pdf]

**Table S1. Parameters used for qPCR**

| <b>Stage</b>   | <b>Temperature (°C)</b> | <b>Duration (s)</b> | <b>Ramp rate (°C/s)</b> | <b>Cycles</b> |
|----------------|-------------------------|---------------------|-------------------------|---------------|
| Pre-incubation | 95                      | 600                 | 4.4                     | 1             |
| Amplification  | 95                      | 5                   | 4.4                     | 45            |
|                | 60                      | 30                  | 2.2                     |               |
| Melt curve     | 95                      | 5                   | 4.4                     | 1             |
|                | 65                      | 61                  | 2.2                     |               |
|                | 97                      | Continuous          | 0.11                    |               |
| Cooling        | 40                      | 10                  | 1.5                     | 1             |
